# Supplementary material for: Identification of Novel Metabolic Subtypes Using Multi-Trait Limited Mixed Regression in the Chinese Population
Source: Biomedicines. 2022 Dec 1;10(12):3093. doi: 10.3390/biomedicines10123093 (PMC9775185; doi:10.3390/biomedicines10123093)
Supplement: Supplementary file 1 [file biomedicines-10-03093-s001.zip › Supplementary table.xlsx]

## Sheet: Stable1
Supplementary table S1. Characteristics of the studies in five inferred metabolic subtypes in the non-medication group*
	Overall	Subtype I	Subtype II	Subtype III	Subtype IV	Reference	P-value
	(N=2778)	(N=274)	(N=803)	(N=449)	(N=520)	(N=732)	among subtypes
Age, years, mean±sd	54.9±8.1	55.3±8.2	56.4±8.5	56.3±8.1	54.2±7.5	52.6±7.5	<0.001
BMI, kg/m2, mean±sd	25.5±3.2	28.5±2.9	25.6±3.1	25.9±3.3	26.0±2.8	23.8±2.6	<0.001
Waist circumference, cm, mean±sd	81.5±8.4	90.2±5.7	81.6±8.0	82.9±8.7	83.0±7.1	76.0±6.4	<0.001
SBP, mmHg, mean±sd	130.1±15.5	127.2±10.7	143.7±14.3	131.7±14.2	124.4±10.9	119.1±9.2	<0.001
DBP, mmHg, mean±sd	74.4±9.3	73.1±7.9	80.5±9.8	74.6±8.7	72.5±7.6	69.6±7.0	<0.001
FBG, mmol/L, mean±sd	5.7±1.0	5.6±0.5	5.5±0.5	6.8±1.7	5.6±1.0	5.3±0.4	<0.001
2h-PBG, mmol/L, mean±sd	7.3±2.7	6.8±1.9	6.8±1.7	10.2±4.0	7.5±2.6	6.3±1.4	<0.001
TC, mmol/L, mean±sd	5.4±1.0	5.4±0.9	5.4±0.9	5.6±1.0	5.6±1.1	4.9±0.7	<0.001
TG, mmol/L, mean±sd	1.5±1.1	1.3±0.5	1.4±0.8	1.3±0.5	2.7±1.9	0.9±0.3	<0.001
LDL-C, mmol/L, mean±sd	3.3±0.8	3.4±0.8	3.3±0.8	3.6±0.8	3.5±0.9	2.9±0.6	<0.001
HDL-C, mmol/L, mean±sd	1.5±0.4	1.4±0.3	1.5±0.4	1.5±0.4	1.2±0.3	1.6±0.3	<0.001
Male, n (%)	960 (34.6%)	108 (39.4%)	298 (37.1%)	191 (42.5%)	192 (36.9%)	171 (23.4%)	0.224
Smoking, n (%)	692 (24.9%)	78 (28.5%)	207 (25.8%)	131 (29.2%)	152 (29.2%)	124 (16.9%)	0.44
Drinking, n (%)	682 (24.6%)	75 (27.4%)	206 (25.7%)	130 (29.0%)	135 (26.0%)	136 (18.6%)	0.608
Hypertension, n (%)	728 (26.2%)	42 (15.3%)	518 (64.5%)	133 (29.6%)	35 (6.7%)	-	<0.001
Type 2 diabetes, n (%)	303 (10.9%)	8 (2.9%)	27 (3.4%)	220 (49.0%)	48 (9.2%)	-	<0.001
Hyperlipidemia, n (%)	1128 (40.6%)	108 (39.4%)	369 (46.0%)	228 (50.8%)	423 (81.3%)	-	<0.001
Coronary Heart Disease, n (%)	99 (3.6%)	12 (4.4%)	34 (4.2%)	23 (5.1%)	19 (3.7%)	11 (1.5%)	0.734
Stroke, n (%)	36 (1.3%)	5 (1.8%)	6 (0.7%)	8 (1.8%)	7 (1.3%)	10 (1.4%)	0.269
Metabolic syndrome, n (%)	392 (14.1%)	37 (13.5%)	143 (17.8%)	115 (25.6%)	97 (18.7%)	-	<0.001
Metabolic syndrome components, n (%)
Abdominal obesity	705 (25.4%)	236 (86.1%)	194 (24.2%)	136 (30.3%)	139 (26.7%)	-	<0.001
High blood pressure	1034 (37.2%)	66 (24.1%)	720 (89.7%)	192 (42.8%)	56 (10.8%)	-	<0.001
High blood glucose	583 (21.0%)	44 (16.1%)	93 (11.6%)	360 (80.2%)	86 (16.5%)	-	<0.001
High blood TG	776 (27.9%)	41 (15.0%)	197 (24.5%)	105 (23.4%)	433 (83.3%)	-	<0.001
Low blood HDL-C	245 (8.8%)	18 (6.6%)	59 (7.3%)	29 (6.5%)	139 (26.7%)	-	<0.001
*BMI, body mass index, SBP, systolic blood pressure, DBP, diastolic blood pressure, FBG, fasting blood glucose, 2h-PBG, 2-hour postprandial blood glucose, TC, total cholesterol, TG, triglyceride, LDL-C, low-density lipoprotein cholesterol, HDL-C, high-density lipoprotein cholesterol, TIA, transient ischemic attacks.

## Sheet: Stable2
Supplementary table S2. Characteristics of the studies in five inferred metabolic subtypes in the medication group*
	Overall	Subtype I	Subtype II	Subtype III	Subtype IV	P-value
	(N=1854)	(N=154)	(N=814)	(N=470)	(N=416)	among subtypes
Age, years, mean±sd	60.5±9.1	60.4±8.3	60.0±9.0	60.8±9.4	61.4±9.1	0.095
BMI, kg/m2, mean±sd	26.8±3.4	28.5±3.7	26.2±3.2	26.7±3.7	27.4±2.8	<0.001
Waist circumference, cm, mean±sd	85.3±8.0	90.0±8.1	83.3±7.5	85.8±8.8	87.0±6.8	<0.001
SBP, mmHg, mean±sd	139.2±16.4	137.3±15.1	143.7±16.9	135.3±14.8	135.8±15.7	<0.001
DBP, mmHg, mean±sd	75.6±10.6	74.5±9.6	78.8±10.7	72.1±9.7	73.5±9.9	<0.001
FBG, mmol/L, mean±sd	6.7±2.1	6.2±1.3	5.9±0.9	8.1±2.9	7.1±2.2	<0.001
2h-PBG, mmol/L, mean±sd	10.1±4.5	8.9±3.5	8.1±2.8	13.0±5.3	11.2±4.4	<0.001
TC, mmol/L, mean±sd	5.2±1.1	5.2±0.9	5.3±1.0	5.0±1.1	5.3±1.1	<0.001
TG, mmol/L, mean±sd	1.7±1.1	1.5±0.7	1.4±0.7	1.4±0.7	2.5±1.8	<0.001
LDL-C, mmol/L, mean±sd	3.2±0.9	3.2±0.8	3.3±0.9	3.0±0.9	3.2±0.9	<0.001
HDL-C, mmol/L, mean±sd	1.4±0.4	1.4±0.4	1.4±0.4	1.4±0.4	1.2±0.3	<0.001
Male, n (%)	753 (40.6%)	58 (37.7%)	317 (38.9%)	208 (44.3%)	170 (40.9%)	0.254
Smoking, n (%)	500 (27.0%)	44 (28.6%)	194 (23.8%)	145 (30.9%)	117 (28.1%)	0.042
Drinking, n (%)	471 (25.4%)	39 (25.3%)	201 (24.7%)	129 (27.4%)	102 (24.5%)	0.702
Medication, n (%)
Antihypertensive drugs	1488 (80.3%)	115 (74.7%)	736 (90.4%)	303 (64.5%)	334 (80.3%)	<0.001
Antidiabetic drugs	537 (29.0%)	52 (33.8%)	127 (15.6%)	211 (44.9%)	147 (35.3%)	<0.001
Lipid-lowing drugs	495 (26.7%)	64 (41.6%)	173 (21.3%)	130 (27.7%)	128 (30.8%)	<0.001
Hypertension, n (%)	1607 (86.7%)	124 (80.5%)	778 (95.6%)	346 (73.6%)	359 (86.3%)	<0.001
Type 2 diabetes, n (%)	793 (42.8%)	58 (37.7%)	185 (22.7%)	331 (70.4%)	219 (52.6%)	<0.001
Hyperlipidemia, n (%)	1189 (64.1%)	110 (71.4%)	447 (54.9%)	297 (63.2%)	335 (80.5%)	<0.001
Coronary Heart Disease, n (%)	406 (21.9%)	25 (16.2%)	158 (19.4%)	117 (24.9%)	106 (25.5%)	0.01
Stroke, n (%)	149 (8.0%)	14 (9.1%)	57 (7.0%)	37 (7.9%)	41 (9.9%)	0.331
Metabolic syndrome, n (%)	750 (40.5%)	68 (44.2%)	222 (27.3%)	207 (44.0%)	253 (60.8%)	<0.001
Metabolic syndrome components, n (%)
Abdominal obesity	772 (41.6%)	114 (74.0%)	230 (28.3%)	213 (45.3%)	215 (51.7%)	<0.001
High blood pressure	1645 (88.7%)	129 (83.8%)	795 (97.7%)	356 (75.7%)	365 (87.7%)	<0.001
High blood glucose	963 (51.9%)	68 (44.2%)	256 (31.4%)	382 (81.3%)	257 (61.8%)	<0.001
High blood TG	640 (34.5%)	52 (33.8%)	198 (24.3%)	120 (25.5%)	270 (64.9%)	<0.001
Low blood HDL-C	234 (12.6%)	19 (12.3%)	62 (7.6%)	65 (13.8%)	88 (21.2%)	<0.001
*BMI, body mass index, SBP, systolic blood pressure, DBP, diastolic blood pressure, FBG, fasting blood glucose, 2h-PBG, 2-hour postprandial blood glucose, TC, total cholesterol, TG, triglyceride, LDL-C, low-density lipoprotein cholesterol, HDL-C, high-density lipoprotein cholesterol, TIA, transient ischemic attacks.

## Sheet: Stable3
Supplementary table S3. 8 identified risk loci of dyslipidemia dominant subtype from the EWAS analysis
Variants	Chrome	Position	Gene	Effect allele	Reference allele	Effect allele frequency	OR (95%CI)	P-value
rs662799	11	116663707	APOA5	G	A	0.288	2.03 (1.69, 2.4)	7.72e-14
rs651821	11	116662579	APOA5	C	T	0.289	2.02 (1.68, 2.43)	1.06e-13
rs7350481	11	116586283	BUD13	T	C	0.252	1.81 (1.49, 2.18)	1.06e-09
rs3741297	11	116657667	ZNF259	T	C	0.062	2.83 (1.98, 4.04)	1.26e-08
rs7519889	11	116649806	WNT4	A	G	0.063	2.80 (1.96, 3.99)	1.4e-08
rs113932726	11	116650638	ZNF259	T	C	0.063	2.80 (1.96, 3.99)	1.43e-08
rs2075291	11	116661392	APOA5	A	C	0.063	2.72 (1.91, 3.86)	2.45e-08
rs66505542	11	116623213	BUD13	TA	T	0.367	1.63 (1.37, 1.94)	3.96e-08

## Sheet: Stable4
Supplementary table S4. Suggestive risk loci of metabolic subtypes from the EWAS analysis
Supplementary table 4. Suggestive risk loci of metabolic subtypes from the EWAS analysis	Chrome	Position	Effect allele	Reference allele	OR	SE	P	Subtype
Supplementary table 4. Suggestive risk loci of metabolic subtypes from the EWAS analysis	2	218275200	T	C	2.49411	0.219797	3.2093e-06	I
Supplementary table 4. Suggestive risk loci of metabolic subtypes from the EWAS analysis	6	21002352	G	A	1.80847	0.14989	7.72526e-06	I
Supplementary table 4. Suggestive risk loci of metabolic subtypes from the EWAS analysis	6	21002453	G	T	1.80038	0.149817	8.68096e-06	I
Supplementary table 4. Suggestive risk loci of metabolic subtypes from the EWAS analysis	7	7168493	G	A	1.56975	0.115242	9.12409e-06	I
Supplementary table 4. Suggestive risk loci of metabolic subtypes from the EWAS analysis	8	4180611	GA	G	0.589723	0.133822	7.93625e-06	I
Supplementary table 4. Suggestive risk loci of metabolic subtypes from the EWAS analysis	11	61746789	A	G	0.602026	0.130258	9.78921e-06	I
Supplementary table 4. Suggestive risk loci of metabolic subtypes from the EWAS analysis	12	10138527	T	C	0.525376	0.164504	9.12985e-06	I
Supplementary table 4. Suggestive risk loci of metabolic subtypes from the EWAS analysis	12	10139760	T	C	0.512848	0.165635	5.53967e-06	I
Supplementary table 4. Suggestive risk loci of metabolic subtypes from the EWAS analysis	12	10150961	A	G	0.536057	0.158938	8.74513e-06	I
Supplementary table 4. Suggestive risk loci of metabolic subtypes from the EWAS analysis	12	10152364	A	C	0.537064	0.159171	9.40447e-06	I
Supplementary table 4. Suggestive risk loci of metabolic subtypes from the EWAS analysis	12	10154538	A	G	0.534841	0.160632	9.78812e-06	I
Supplementary table 4. Suggestive risk loci of metabolic subtypes from the EWAS analysis	12	87901028	G	A	1.61048	0.111231	1.83438e-06	I
Supplementary table 4. Suggestive risk loci of metabolic subtypes from the EWAS analysis	14	91881921	A	G	1.90291	0.157524	4.41974e-06	I
Supplementary table 4. Suggestive risk loci of metabolic subtypes from the EWAS analysis	14	91884762	C	T	1.90291	0.157524	4.41974e-06	I
Supplementary table 4. Suggestive risk loci of metabolic subtypes from the EWAS analysis	14	91912716	T	C	1.91021	0.160054	5.26092e-06	I
Supplementary table 4. Suggestive risk loci of metabolic subtypes from the EWAS analysis	4	53126698	A	T	0.670441	0.0903826	9.70516e-06	II
Supplementary table 4. Suggestive risk loci of metabolic subtypes from the EWAS analysis	4	53126717	A	T	0.67044	0.0903866	9.71376e-06	II
Supplementary table 4. Suggestive risk loci of metabolic subtypes from the EWAS analysis	4	53126996	A	G	0.67044	0.0903866	9.71376e-06	II
Supplementary table 4. Suggestive risk loci of metabolic subtypes from the EWAS analysis	4	53127001	T	G	0.67044	0.0903866	9.71376e-06	II
Supplementary table 4. Suggestive risk loci of metabolic subtypes from the EWAS analysis	4	53127951	A	G	0.661548	0.0910687	5.70789e-06	II
Supplementary table 4. Suggestive risk loci of metabolic subtypes from the EWAS analysis	4	53128352	A	G	0.685794	0.0903741	2.9993e-05	II
Supplementary table 4. Suggestive risk loci of metabolic subtypes from the EWAS analysis	4	53129252	A	G	0.685794	0.0903741	2.9993e-05	II
Supplementary table 4. Suggestive risk loci of metabolic subtypes from the EWAS analysis	4	53129701	G	C	0.685794	0.0903741	2.9993e-05	II
Supplementary table 4. Suggestive risk loci of metabolic subtypes from the EWAS analysis	4	53130140	A	C	0.669094	0.0925594	1.41623e-05	II
Supplementary table 4. Suggestive risk loci of metabolic subtypes from the EWAS analysis	4	53130243	C	A	0.685794	0.0903741	2.9993e-05	II
Supplementary table 4. Suggestive risk loci of metabolic subtypes from the EWAS analysis	4	53130507	A	G	0.667619	0.0911085	9.22097e-06	II
Supplementary table 4. Suggestive risk loci of metabolic subtypes from the EWAS analysis	4	53130753	T	C	0.685794	0.0903741	2.9993e-05	II
Supplementary table 4. Suggestive risk loci of metabolic subtypes from the EWAS analysis	4	53130988	C	CT	0.662661	0.0911669	6.37319e-06	II
Supplementary table 4. Suggestive risk loci of metabolic subtypes from the EWAS analysis	4	53131271	A	G	0.665092	0.0910542	7.50002e-06	II
Supplementary table 4. Suggestive risk loci of metabolic subtypes from the EWAS analysis	4	53131785	G	A	0.685794	0.0903741	2.9993e-05	II
Supplementary table 4. Suggestive risk loci of metabolic subtypes from the EWAS analysis	4	53131981	G	T	0.68197	0.0902978	2.24543e-05	II
Supplementary table 4. Suggestive risk loci of metabolic subtypes from the EWAS analysis	4	53133213	G	C	0.676143	0.0897335	1.29315e-05	II
Supplementary table 4. Suggestive risk loci of metabolic subtypes from the EWAS analysis	4	53133283	C	T	0.665934	0.0907449	7.45359e-06	II
Supplementary table 4. Suggestive risk loci of metabolic subtypes from the EWAS analysis	4	53134211	T	C	0.674464	0.0897424	1.14117e-05	II
Supplementary table 4. Suggestive risk loci of metabolic subtypes from the EWAS analysis	4	53134293	T	G	0.678805	0.0895146	1.50455e-05	II
Supplementary table 4. Suggestive risk loci of metabolic subtypes from the EWAS analysis	4	53135100	A	T	0.679211	0.089765	1.63784e-05	II
Supplementary table 4. Suggestive risk loci of metabolic subtypes from the EWAS analysis	4	53135973	A	C	0.669789	0.094908	2.41123e-05	II
Supplementary table 4. Suggestive risk loci of metabolic subtypes from the EWAS analysis	4	53136304	T	C	0.679111	0.0921272	2.66446e-05	II
Supplementary table 4. Suggestive risk loci of metabolic subtypes from the EWAS analysis	4	53136700	A	T	0.673063	0.093062	2.09672e-05	II
Supplementary table 4. Suggestive risk loci of metabolic subtypes from the EWAS analysis	4	53136776	G	T	0.68515	0.0894585	2.37102e-05	II
Supplementary table 4. Suggestive risk loci of metabolic subtypes from the EWAS analysis	4	53137928	T	G	0.668626	0.0948902	2.21467e-05	II
Supplementary table 4. Suggestive risk loci of metabolic subtypes from the EWAS analysis	4	53137990	C	T	0.673062	0.0930647	2.09786e-05	II
Supplementary table 4. Suggestive risk loci of metabolic subtypes from the EWAS analysis	4	53138453	CT	C	0.672155	0.0926614	1.80869e-05	II
Supplementary table 4. Suggestive risk loci of metabolic subtypes from the EWAS analysis	4	53138486	A	G	0.672155	0.0926614	1.80869e-05	II
Supplementary table 4. Suggestive risk loci of metabolic subtypes from the EWAS analysis	4	53139187	C	T	0.680379	0.0921445	2.92333e-05	II
Supplementary table 4. Suggestive risk loci of metabolic subtypes from the EWAS analysis	4	53139484	A	G	0.680379	0.0921445	2.92333e-05	II
Supplementary table 4. Suggestive risk loci of metabolic subtypes from the EWAS analysis	4	53141723	C	T	0.659556	0.0940435	9.62224e-06	II
Supplementary table 4. Suggestive risk loci of metabolic subtypes from the EWAS analysis	4	53142116	T	C	0.673062	0.0930647	2.09786e-05	II
Supplementary table 4. Suggestive risk loci of metabolic subtypes from the EWAS analysis	4	53142291	G	C	0.67878	0.092165	2.62289e-05	II
Supplementary table 4. Suggestive risk loci of metabolic subtypes from the EWAS analysis	4	53142519	T	G	0.673062	0.0930647	2.09786e-05	II
Supplementary table 4. Suggestive risk loci of metabolic subtypes from the EWAS analysis	4	53142623	C	G	0.673062	0.0930647	2.09786e-05	II
Supplementary table 4. Suggestive risk loci of metabolic subtypes from the EWAS analysis	4	53143285	G	A	0.680379	0.0921445	2.92333e-05	II
Supplementary table 4. Suggestive risk loci of metabolic subtypes from the EWAS analysis	4	53143716	A	G	0.685995	0.0925502	4.65681e-05	II
Supplementary table 4. Suggestive risk loci of metabolic subtypes from the EWAS analysis	4	53144232	T	G	0.677676	0.0922769	2.48122e-05	II
Supplementary table 4. Suggestive risk loci of metabolic subtypes from the EWAS analysis	4	53144248	G	C	0.673062	0.0930647	2.09786e-05	II
Supplementary table 4. Suggestive risk loci of metabolic subtypes from the EWAS analysis	4	53144311	A	G	0.680379	0.0921445	2.92333e-05	II
Supplementary table 4. Suggestive risk loci of metabolic subtypes from the EWAS analysis	4	53144736	T	C	0.668626	0.0948902	2.21467e-05	II
Supplementary table 4. Suggestive risk loci of metabolic subtypes from the EWAS analysis	4	53145897	T	C	0.680379	0.0921445	2.92333e-05	II
Supplementary table 4. Suggestive risk loci of metabolic subtypes from the EWAS analysis	4	53146353	A	G	0.673062	0.0930647	2.09786e-05	II
Supplementary table 4. Suggestive risk loci of metabolic subtypes from the EWAS analysis	4	53146397	A	G	0.680379	0.0921445	2.92333e-05	II
Supplementary table 4. Suggestive risk loci of metabolic subtypes from the EWAS analysis	4	53146521	G	A	0.675273	0.0942825	3.12061e-05	II
Supplementary table 4. Suggestive risk loci of metabolic subtypes from the EWAS analysis	4	53146599	G	A	0.672833	0.0943895	2.69143e-05	II
Supplementary table 4. Suggestive risk loci of metabolic subtypes from the EWAS analysis	4	53147061	A	G	0.680379	0.0921445	2.92333e-05	II
Supplementary table 4. Suggestive risk loci of metabolic subtypes from the EWAS analysis	4	53147277	C	T	0.680379	0.0921445	2.92333e-05	II
Supplementary table 4. Suggestive risk loci of metabolic subtypes from the EWAS analysis	4	53149434	G	C	0.680379	0.0921445	2.92333e-05	II
Supplementary table 4. Suggestive risk loci of metabolic subtypes from the EWAS analysis	4	53150028	G	A	0.680379	0.0921445	2.92333e-05	II
Supplementary table 4. Suggestive risk loci of metabolic subtypes from the EWAS analysis	4	53150547	T	C	0.680379	0.0921445	2.92333e-05	II
Supplementary table 4. Suggestive risk loci of metabolic subtypes from the EWAS analysis	4	53150560	ATT	A	0.667559	0.0935482	1.56035e-05	II
Supplementary table 4. Suggestive risk loci of metabolic subtypes from the EWAS analysis	4	53151436	C	CTACTT	0.682388	0.0920788	3.32006e-05	II
Supplementary table 4. Suggestive risk loci of metabolic subtypes from the EWAS analysis	4	53151459	A	G	0.682388	0.0920788	3.32006e-05	II
Supplementary table 4. Suggestive risk loci of metabolic subtypes from the EWAS analysis	4	53151998	C	T	0.685562	0.0920658	4.12255e-05	II
Supplementary table 4. Suggestive risk loci of metabolic subtypes from the EWAS analysis	4	53154223	C	T	0.682388	0.0920788	3.32006e-05	II
Supplementary table 4. Suggestive risk loci of metabolic subtypes from the EWAS analysis	4	53154224	A	G	0.682388	0.0920788	3.32006e-05	II
Supplementary table 4. Suggestive risk loci of metabolic subtypes from the EWAS analysis	4	53154399	G	C	0.682388	0.0920788	3.32006e-05	II
Supplementary table 4. Suggestive risk loci of metabolic subtypes from the EWAS analysis	4	53154570	T	C	0.682388	0.0920788	3.32006e-05	II
Supplementary table 4. Suggestive risk loci of metabolic subtypes from the EWAS analysis	4	53154887	C	CCCAAATAATGCTGATGTTG	0.682388	0.0920788	3.32006e-05	II
Supplementary table 4. Suggestive risk loci of metabolic subtypes from the EWAS analysis	4	53156787	T	C	0.680138	0.0921452	2.87464e-05	II
Supplementary table 4. Suggestive risk loci of metabolic subtypes from the EWAS analysis	4	53157424	T	G	0.681783	0.0923501	3.35791e-05	II
Supplementary table 4. Suggestive risk loci of metabolic subtypes from the EWAS analysis	4	53157995	T	C	0.682467	0.0923783	3.54016e-05	II
Supplementary table 4. Suggestive risk loci of metabolic subtypes from the EWAS analysis	4	53158527	CT	C	0.662377	0.0942323	1.23487e-05	II
Supplementary table 4. Suggestive risk loci of metabolic subtypes from the EWAS analysis	4	53163591	T	C	0.656153	0.0953284	9.86514e-06	II
Supplementary table 4. Suggestive risk loci of metabolic subtypes from the EWAS analysis	4	53167696	T	C	0.657043	0.0952172	1.02882e-05	II
Supplementary table 4. Suggestive risk loci of metabolic subtypes from the EWAS analysis	4	53171156	C	T	0.646346	0.0966613	6.33338e-06	II
Supplementary table 4. Suggestive risk loci of metabolic subtypes from the EWAS analysis	4	53172686	C	G	0.645676	0.0966358	5.98644e-06	II
Supplementary table 4. Suggestive risk loci of metabolic subtypes from the EWAS analysis	4	53173382	A	G	0.657835	0.0952317	1.09402e-05	II
Supplementary table 4. Suggestive risk loci of metabolic subtypes from the EWAS analysis	4	53174220	C	T	0.657282	0.0951842	1.03978e-05	II
Supplementary table 4. Suggestive risk loci of metabolic subtypes from the EWAS analysis	4	53176315	CT	C	0.658514	0.0952587	1.15649e-05	II
Supplementary table 4. Suggestive risk loci of metabolic subtypes from the EWAS analysis	4	53179320	T	C	0.657282	0.0951842	1.03978e-05	II
Supplementary table 4. Suggestive risk loci of metabolic subtypes from the EWAS analysis	4	53181225	A	C	0.658928	0.0953427	1.21333e-05	II
Supplementary table 4. Suggestive risk loci of metabolic subtypes from the EWAS analysis	4	53181358	G	A	0.656309	0.095194	9.69598e-06	II
Supplementary table 4. Suggestive risk loci of metabolic subtypes from the EWAS analysis	4	53186430	G	A	0.663555	0.0963804	2.08615e-05	II
Supplementary table 4. Suggestive risk loci of metabolic subtypes from the EWAS analysis	4	53186569	A	C	0.656632	0.0952739	1.01023e-05	II
Supplementary table 4. Suggestive risk loci of metabolic subtypes from the EWAS analysis	4	53187431	T	G	0.657611	0.095264	1.08355e-05	II
Supplementary table 4. Suggestive risk loci of metabolic subtypes from the EWAS analysis	4	53190312	C	T	0.657611	0.095264	1.08355e-05	II
Supplementary table 4. Suggestive risk loci of metabolic subtypes from the EWAS analysis	4	53192725	C	T	0.640195	0.0975442	4.82843e-06	II
Supplementary table 4. Suggestive risk loci of metabolic subtypes from the EWAS analysis	4	53193560	A	G	0.656909	0.0952438	1.02449e-05	II
Supplementary table 4. Suggestive risk loci of metabolic subtypes from the EWAS analysis	4	53193835	A	T	0.657611	0.095264	1.08355e-05	II
Supplementary table 4. Suggestive risk loci of metabolic subtypes from the EWAS analysis	4	53194528	T	TTTTA	0.644866	0.0966403	5.6348e-06	II
Supplementary table 4. Suggestive risk loci of metabolic subtypes from the EWAS analysis	4	53196995	C	G	0.65891	0.0952767	1.19504e-05	II
Supplementary table 4. Suggestive risk loci of metabolic subtypes from the EWAS analysis	4	53199621	C	T	0.653894	0.0970572	1.20372e-05	II
Supplementary table 4. Suggestive risk loci of metabolic subtypes from the EWAS analysis	4	53201986	C	T	0.651354	0.0971203	1.01415e-05	II
Supplementary table 4. Suggestive risk loci of metabolic subtypes from the EWAS analysis	4	53203778	C	T	0.65891	0.0952767	1.19504e-05	II
Supplementary table 4. Suggestive risk loci of metabolic subtypes from the EWAS analysis	4	53208616	T	C	0.658229	0.0952497	1.13045e-05	II
Supplementary table 4. Suggestive risk loci of metabolic subtypes from the EWAS analysis	4	53208726	A	G	0.653215	0.0970318	1.13998e-05	II
Supplementary table 4. Suggestive risk loci of metabolic subtypes from the EWAS analysis	4	53209001	C	A	0.65788	0.0953135	1.11688e-05	II
Supplementary table 4. Suggestive risk loci of metabolic subtypes from the EWAS analysis	4	53211640	A	C	0.658557	0.0953401	1.18026e-05	II
Supplementary table 4. Suggestive risk loci of metabolic subtypes from the EWAS analysis	4	53214450	A	G	0.658557	0.0953401	1.18026e-05	II
Supplementary table 4. Suggestive risk loci of metabolic subtypes from the EWAS analysis	4	53217422	C	T	0.653894	0.0970572	1.20372e-05	II
Supplementary table 4. Suggestive risk loci of metabolic subtypes from the EWAS analysis	7	105847289	A	G	0.718858	0.0796646	3.42015e-05	II
Supplementary table 4. Suggestive risk loci of metabolic subtypes from the EWAS analysis	7	105847737	A	AG	0.717302	0.079565	2.96757e-05	II
Supplementary table 4. Suggestive risk loci of metabolic subtypes from the EWAS analysis	7	105847739	A	G	0.717302	0.079565	2.96757e-05	II
Supplementary table 4. Suggestive risk loci of metabolic subtypes from the EWAS analysis	7	105849736	G	A	0.719753	0.0796437	3.64382e-05	II
Supplementary table 4. Suggestive risk loci of metabolic subtypes from the EWAS analysis	7	105853166	T	G	0.721668	0.0798225	4.38043e-05	II
Supplementary table 4. Suggestive risk loci of metabolic subtypes from the EWAS analysis	7	105855430	A	G	0.720482	0.0796007	3.81366e-05	II
Supplementary table 4. Suggestive risk loci of metabolic subtypes from the EWAS analysis	7	105855586	C	G	0.71504	0.0795098	2.45867e-05	II
Supplementary table 4. Suggestive risk loci of metabolic subtypes from the EWAS analysis	7	105855618	A	C	0.716628	0.0794808	2.76279e-05	II
Supplementary table 4. Suggestive risk loci of metabolic subtypes from the EWAS analysis	7	105855764	G	A	0.710801	0.0795063	1.75851e-05	II
Supplementary table 4. Suggestive risk loci of metabolic subtypes from the EWAS analysis	7	105856140	T	A	0.71504	0.0795098	2.45867e-05	II
Supplementary table 4. Suggestive risk loci of metabolic subtypes from the EWAS analysis	7	105856721	C	CA	0.719309	0.0794125	3.34262e-05	II
Supplementary table 4. Suggestive risk loci of metabolic subtypes from the EWAS analysis	7	105858211	A	C	0.719506	0.0792526	3.27158e-05	II
Supplementary table 4. Suggestive risk loci of metabolic subtypes from the EWAS analysis	7	105858812	G	C	0.722954	0.0785407	3.62016e-05	II
Supplementary table 4. Suggestive risk loci of metabolic subtypes from the EWAS analysis	7	105865194	A	G	0.724263	0.079279	4.71764e-05	II
Supplementary table 4. Suggestive risk loci of metabolic subtypes from the EWAS analysis	7	105865711	AG	A	0.721983	0.0797151	4.37974e-05	II
Supplementary table 4. Suggestive risk loci of metabolic subtypes from the EWAS analysis	7	105868683	T	A	0.721084	0.0799301	4.29391e-05	II
Supplementary table 4. Suggestive risk loci of metabolic subtypes from the EWAS analysis	11	66847211	A	C	2.18612	0.187345	2.98252e-05	II
Supplementary table 4. Suggestive risk loci of metabolic subtypes from the EWAS analysis	11	67188466	T	C	1.63286	0.117669	3.08557e-05	II
Supplementary table 4. Suggestive risk loci of metabolic subtypes from the EWAS analysis	19	39971432	C	G	0.591169	0.126395	3.19893e-05	II
Supplementary table 4. Suggestive risk loci of metabolic subtypes from the EWAS analysis	21	47620022	C	A	0.244826	0.332384	2.29899e-05	II
Supplementary table 4. Suggestive risk loci of metabolic subtypes from the EWAS analysis	4	53136304	T	C	0.65163	0.108822	8.29876e-06	III
Supplementary table 4. Suggestive risk loci of metabolic subtypes from the EWAS analysis	4	53136700	A	T	0.651012	0.109544	8.91725e-06	III
Supplementary table 4. Suggestive risk loci of metabolic subtypes from the EWAS analysis	4	53137990	C	T	0.651012	0.109549	8.92399e-06	III
Supplementary table 4. Suggestive risk loci of metabolic subtypes from the EWAS analysis	4	53138453	CT	C	0.652459	0.109034	8.99274e-06	III
Supplementary table 4. Suggestive risk loci of metabolic subtypes from the EWAS analysis	4	53138486	A	G	0.652459	0.109034	8.99274e-06	III
Supplementary table 4. Suggestive risk loci of metabolic subtypes from the EWAS analysis	4	53139187	C	T	0.653421	0.108851	9.25575e-06	III
Supplementary table 4. Suggestive risk loci of metabolic subtypes from the EWAS analysis	4	53139484	A	G	0.653421	0.108851	9.25575e-06	III
Supplementary table 4. Suggestive risk loci of metabolic subtypes from the EWAS analysis	4	53142116	T	C	0.651012	0.109549	8.92399e-06	III
Supplementary table 4. Suggestive risk loci of metabolic subtypes from the EWAS analysis	4	53142291	G	C	0.651339	0.108947	8.31321e-06	III
Supplementary table 4. Suggestive risk loci of metabolic subtypes from the EWAS analysis	4	53142519	T	G	0.651012	0.109549	8.92399e-06	III
Supplementary table 4. Suggestive risk loci of metabolic subtypes from the EWAS analysis	4	53142623	C	G	0.651012	0.109549	8.92399e-06	III
Supplementary table 4. Suggestive risk loci of metabolic subtypes from the EWAS analysis	4	53143285	G	A	0.653421	0.108851	9.25575e-06	III
Supplementary table 4. Suggestive risk loci of metabolic subtypes from the EWAS analysis	4	53144232	T	G	0.653421	0.108851	9.25575e-06	III
Supplementary table 4. Suggestive risk loci of metabolic subtypes from the EWAS analysis	4	53144248	G	C	0.651012	0.109549	8.92399e-06	III
Supplementary table 4. Suggestive risk loci of metabolic subtypes from the EWAS analysis	4	53144311	A	G	0.653421	0.108851	9.25575e-06	III
Supplementary table 4. Suggestive risk loci of metabolic subtypes from the EWAS analysis	4	53145897	T	C	0.653421	0.108851	9.25575e-06	III
Supplementary table 4. Suggestive risk loci of metabolic subtypes from the EWAS analysis	4	53146353	A	G	0.651012	0.109549	8.92399e-06	III
Supplementary table 4. Suggestive risk loci of metabolic subtypes from the EWAS analysis	4	53146397	A	G	0.653421	0.108851	9.25575e-06	III
Supplementary table 4. Suggestive risk loci of metabolic subtypes from the EWAS analysis	4	53147061	A	G	0.653421	0.108851	9.25575e-06	III
Supplementary table 4. Suggestive risk loci of metabolic subtypes from the EWAS analysis	4	53147277	C	T	0.653421	0.108851	9.25575e-06	III
Supplementary table 4. Suggestive risk loci of metabolic subtypes from the EWAS analysis	4	53149434	G	C	0.653421	0.108851	9.25575e-06	III
Supplementary table 4. Suggestive risk loci of metabolic subtypes from the EWAS analysis	4	53150028	G	A	0.653421	0.108851	9.25575e-06	III
Supplementary table 4. Suggestive risk loci of metabolic subtypes from the EWAS analysis	4	53150547	T	C	0.653421	0.108851	9.25575e-06	III
Supplementary table 4. Suggestive risk loci of metabolic subtypes from the EWAS analysis	4	53151436	C	CTACTT	0.653421	0.108851	9.25575e-06	III
Supplementary table 4. Suggestive risk loci of metabolic subtypes from the EWAS analysis	4	53151998	C	T	0.651823	0.108865	8.44809e-06	III
Supplementary table 4. Suggestive risk loci of metabolic subtypes from the EWAS analysis	4	53154223	C	T	0.653421	0.108851	9.25575e-06	III
Supplementary table 4. Suggestive risk loci of metabolic subtypes from the EWAS analysis	4	53154224	A	G	0.653421	0.108851	9.25575e-06	III
Supplementary table 4. Suggestive risk loci of metabolic subtypes from the EWAS analysis	4	53154887	C	CCCAAATAATGCTGATGTTG	0.653421	0.108851	9.25575e-06	III
Supplementary table 4. Suggestive risk loci of metabolic subtypes from the EWAS analysis	4	53156787	T	C	0.650819	0.109113	8.26843e-06	III
Supplementary table 4. Suggestive risk loci of metabolic subtypes from the EWAS analysis	4	53157424	T	G	0.651721	0.109337	9.0113e-06	III
Supplementary table 4. Suggestive risk loci of metabolic subtypes from the EWAS analysis	4	53157995	T	C	0.651166	0.109331	8.71742e-06	III
Supplementary table 4. Suggestive risk loci of metabolic subtypes from the EWAS analysis	6	29940786	T	A	0.595434	0.129424	6.17752e-06	III
Supplementary table 4. Suggestive risk loci of metabolic subtypes from the EWAS analysis	6	105583603	T	G	5.5635	0.409892	2.8264e-06	III
Supplementary table 4. Suggestive risk loci of metabolic subtypes from the EWAS analysis	7	50430592	C	T	1.51034	0.105283	8.98578e-06	III
Supplementary table 4. Suggestive risk loci of metabolic subtypes from the EWAS analysis	11	11826054	C	T	0.703339	0.0898707	9.01013e-06	III
Supplementary table 4. Suggestive risk loci of metabolic subtypes from the EWAS analysis	11	11829828	G	A	0.700733	0.0899796	7.73942e-06	III
Supplementary table 4. Suggestive risk loci of metabolic subtypes from the EWAS analysis	19	49206631	T	A	0.701256	0.0897632	7.70059e-06	III
Supplementary table 4. Suggestive risk loci of metabolic subtypes from the EWAS analysis	21	46092267	T	C	0.524685	0.164331	8.68259e-06	III
Supplementary table 4. Suggestive risk loci of metabolic subtypes from the EWAS analysis	1	62926057	A	T	0.659535	0.0995814	2.91892e-05	IV
Supplementary table 4. Suggestive risk loci of metabolic subtypes from the EWAS analysis	1	62926371	G	A	0.665636	0.100112	4.79129e-05	IV
Supplementary table 4. Suggestive risk loci of metabolic subtypes from the EWAS analysis	1	62929892	G	A	0.654323	0.0995371	2.03272e-05	IV
Supplementary table 4. Suggestive risk loci of metabolic subtypes from the EWAS analysis	1	62930224	G	A	0.654323	0.0995371	2.03272e-05	IV
Supplementary table 4. Suggestive risk loci of metabolic subtypes from the EWAS analysis	1	62931632	C	A	0.654323	0.0995371	2.03272e-05	IV
Supplementary table 4. Suggestive risk loci of metabolic subtypes from the EWAS analysis	1	62933758	G	A	0.655324	0.0994657	2.14769e-05	IV
Supplementary table 4. Suggestive risk loci of metabolic subtypes from the EWAS analysis	1	62934002	A	G	0.658092	0.100157	2.94676e-05	IV
Supplementary table 4. Suggestive risk loci of metabolic subtypes from the EWAS analysis	1	62934308	A	G	0.651701	0.0996746	1.74162e-05	IV
Supplementary table 4. Suggestive risk loci of metabolic subtypes from the EWAS analysis	1	62934846	G	A	0.65885	0.0997139	2.85704e-05	IV
Supplementary table 4. Suggestive risk loci of metabolic subtypes from the EWAS analysis	1	62939466	C	G	0.661849	0.100224	3.82293e-05	IV
Supplementary table 4. Suggestive risk loci of metabolic subtypes from the EWAS analysis	1	62943007	G	T	0.65303	0.0995631	1.86875e-05	IV
Supplementary table 4. Suggestive risk loci of metabolic subtypes from the EWAS analysis	1	62943954	G	A	0.654323	0.0995371	2.03272e-05	IV
Supplementary table 4. Suggestive risk loci of metabolic subtypes from the EWAS analysis	1	62943979	G	A	0.654323	0.0995371	2.03272e-05	IV
Supplementary table 4. Suggestive risk loci of metabolic subtypes from the EWAS analysis	1	62962734	A	G	0.666238	0.098523	3.75668e-05	IV
Supplementary table 4. Suggestive risk loci of metabolic subtypes from the EWAS analysis	1	62963737	G	A	0.650984	0.0990344	1.46051e-05	IV
Supplementary table 4. Suggestive risk loci of metabolic subtypes from the EWAS analysis	1	62963914	G	C	0.652015	0.0989613	1.54779e-05	IV
Supplementary table 4. Suggestive risk loci of metabolic subtypes from the EWAS analysis	1	62967747	A	G	0.651063	0.0990073	1.46079e-05	IV
Supplementary table 4. Suggestive risk loci of metabolic subtypes from the EWAS analysis	1	62967987	C	T	0.649415	0.0990085	1.30026e-05	IV
Supplementary table 4. Suggestive risk loci of metabolic subtypes from the EWAS analysis	1	62968491	C	T	0.649415	0.0990085	1.30026e-05	IV
Supplementary table 4. Suggestive risk loci of metabolic subtypes from the EWAS analysis	1	62969402	G	A	0.650445	0.0989354	1.37839e-05	IV
Supplementary table 4. Suggestive risk loci of metabolic subtypes from the EWAS analysis	1	62969431	G	A	0.649415	0.0990085	1.30026e-05	IV
Supplementary table 4. Suggestive risk loci of metabolic subtypes from the EWAS analysis	1	62970184	T	C	0.666238	0.098523	3.75668e-05	IV
Supplementary table 4. Suggestive risk loci of metabolic subtypes from the EWAS analysis	1	62970996	T	C	0.649415	0.0990085	1.30026e-05	IV
Supplementary table 4. Suggestive risk loci of metabolic subtypes from the EWAS analysis	1	62972142	CT	C	0.645241	0.0997434	1.12011e-05	IV
Supplementary table 4. Suggestive risk loci of metabolic subtypes from the EWAS analysis	1	62972228	G	A	0.65142	0.0990559	1.51253e-05	IV
Supplementary table 4. Suggestive risk loci of metabolic subtypes from the EWAS analysis	1	62973795	A	G	0.64835	0.0990256	1.20943e-05	IV
Supplementary table 4. Suggestive risk loci of metabolic subtypes from the EWAS analysis	1	62974150	A	T	0.666238	0.098523	3.75668e-05	IV
Supplementary table 4. Suggestive risk loci of metabolic subtypes from the EWAS analysis	1	62977419	G	A	0.666238	0.098523	3.75668e-05	IV
Supplementary table 4. Suggestive risk loci of metabolic subtypes from the EWAS analysis	1	62977558	A	C	0.667261	0.0984535	3.96886e-05	IV
Supplementary table 4. Suggestive risk loci of metabolic subtypes from the EWAS analysis	1	62980161	A	G	0.649415	0.0990085	1.30026e-05	IV
Supplementary table 4. Suggestive risk loci of metabolic subtypes from the EWAS analysis	1	62980399	CACA	C	0.649558	0.0990036	1.31219e-05	IV
Supplementary table 4. Suggestive risk loci of metabolic subtypes from the EWAS analysis	1	62980607	A	G	0.655418	0.0993822	2.12737e-05	IV
Supplementary table 4. Suggestive risk loci of metabolic subtypes from the EWAS analysis	1	62981440	G	A	0.649415	0.0990085	1.30026e-05	IV
Supplementary table 4. Suggestive risk loci of metabolic subtypes from the EWAS analysis	1	62983693	A	C	0.664317	0.0986323	3.3735e-05	IV
Supplementary table 4. Suggestive risk loci of metabolic subtypes from the EWAS analysis	1	62983751	C	T	0.666238	0.098523	3.75668e-05	IV
Supplementary table 4. Suggestive risk loci of metabolic subtypes from the EWAS analysis	1	62986157	CAT	C	0.667261	0.0984535	3.96886e-05	IV
Supplementary table 4. Suggestive risk loci of metabolic subtypes from the EWAS analysis	1	62986955	C	T	0.666238	0.098523	3.75668e-05	IV
Supplementary table 4. Suggestive risk loci of metabolic subtypes from the EWAS analysis	1	62987289	T	C	0.667261	0.0984535	3.96886e-05	IV
Supplementary table 4. Suggestive risk loci of metabolic subtypes from the EWAS analysis	1	62988972	T	C	0.666238	0.098523	3.75668e-05	IV
Supplementary table 4. Suggestive risk loci of metabolic subtypes from the EWAS analysis	1	62989807	C	T	0.666238	0.098523	3.75668e-05	IV
Supplementary table 4. Suggestive risk loci of metabolic subtypes from the EWAS analysis	1	62991369	T	C	0.667261	0.0984535	3.96886e-05	IV
Supplementary table 4. Suggestive risk loci of metabolic subtypes from the EWAS analysis	1	62991905	T	C	0.666238	0.098523	3.75668e-05	IV
Supplementary table 4. Suggestive risk loci of metabolic subtypes from the EWAS analysis	1	62993068	G	A	0.656909	0.0986507	2.04819e-05	IV
Supplementary table 4. Suggestive risk loci of metabolic subtypes from the EWAS analysis	1	62993620	T	C	0.667261	0.0984535	3.96886e-05	IV
Supplementary table 4. Suggestive risk loci of metabolic subtypes from the EWAS analysis	1	62996046	C	G	0.665356	0.0985294	3.54728e-05	IV
Supplementary table 4. Suggestive risk loci of metabolic subtypes from the EWAS analysis	1	62996838	C	G	0.666238	0.098523	3.75668e-05	IV
Supplementary table 4. Suggestive risk loci of metabolic subtypes from the EWAS analysis	1	62999110	A	AT	0.664734	0.0989611	3.68244e-05	IV
Supplementary table 4. Suggestive risk loci of metabolic subtypes from the EWAS analysis	1	62999595	C	G	0.666238	0.098523	3.75668e-05	IV
Supplementary table 4. Suggestive risk loci of metabolic subtypes from the EWAS analysis	1	63001120	A	C	0.666238	0.098523	3.75668e-05	IV
Supplementary table 4. Suggestive risk loci of metabolic subtypes from the EWAS analysis	1	63002551	A	G	0.666238	0.098523	3.75668e-05	IV
Supplementary table 4. Suggestive risk loci of metabolic subtypes from the EWAS analysis	1	63005950	T	C	0.666238	0.098523	3.75668e-05	IV
Supplementary table 4. Suggestive risk loci of metabolic subtypes from the EWAS analysis	1	63006087	C	A	0.667261	0.0984535	3.96886e-05	IV
Supplementary table 4. Suggestive risk loci of metabolic subtypes from the EWAS analysis	1	63006595	A	T	0.666238	0.098523	3.75668e-05	IV
Supplementary table 4. Suggestive risk loci of metabolic subtypes from the EWAS analysis	1	63006842	A	C	0.666238	0.098523	3.75668e-05	IV
Supplementary table 4. Suggestive risk loci of metabolic subtypes from the EWAS analysis	1	63007228	G	A	0.666238	0.098523	3.75668e-05	IV
Supplementary table 4. Suggestive risk loci of metabolic subtypes from the EWAS analysis	1	63007721	A	T	0.665817	0.0986396	3.73156e-05	IV
Supplementary table 4. Suggestive risk loci of metabolic subtypes from the EWAS analysis	1	63009900	A	G	0.667261	0.0984535	3.96886e-05	IV
Supplementary table 4. Suggestive risk loci of metabolic subtypes from the EWAS analysis	1	63009956	C	T	0.666238	0.098523	3.75668e-05	IV
Supplementary table 4. Suggestive risk loci of metabolic subtypes from the EWAS analysis	1	63010110	G	C	0.665927	0.0985149	3.67448e-05	IV
Supplementary table 4. Suggestive risk loci of metabolic subtypes from the EWAS analysis	1	63010871	T	C	0.664866	0.0985666	3.45713e-05	IV
Supplementary table 4. Suggestive risk loci of metabolic subtypes from the EWAS analysis	1	63012056	A	G	0.665496	0.0984507	3.52935e-05	IV
Supplementary table 4. Suggestive risk loci of metabolic subtypes from the EWAS analysis	1	63012071	A	C	0.665496	0.0984507	3.52935e-05	IV
Supplementary table 4. Suggestive risk loci of metabolic subtypes from the EWAS analysis	1	63012107	C	T	0.665496	0.0984507	3.52935e-05	IV
Supplementary table 4. Suggestive risk loci of metabolic subtypes from the EWAS analysis	1	63013396	C	T	0.668046	0.0984528	4.17851e-05	IV
Supplementary table 4. Suggestive risk loci of metabolic subtypes from the EWAS analysis	1	63013786	A	G	0.668046	0.0984528	4.17851e-05	IV
Supplementary table 4. Suggestive risk loci of metabolic subtypes from the EWAS analysis	1	63018170	T	C	0.669068	0.0983836	4.41306e-05	IV
Supplementary table 4. Suggestive risk loci of metabolic subtypes from the EWAS analysis	1	63019919	G	A	0.669068	0.0983836	4.41306e-05	IV
Supplementary table 4. Suggestive risk loci of metabolic subtypes from the EWAS analysis	1	63025942	G	T	0.669068	0.0983836	4.41306e-05	IV
Supplementary table 4. Suggestive risk loci of metabolic subtypes from the EWAS analysis	1	63026011	C	T	0.669068	0.0983836	4.41306e-05	IV
Supplementary table 4. Suggestive risk loci of metabolic subtypes from the EWAS analysis	1	63026429	T	G	0.669068	0.0983836	4.41306e-05	IV
Supplementary table 4. Suggestive risk loci of metabolic subtypes from the EWAS analysis	1	63027024	C	T	0.669068	0.0983836	4.41306e-05	IV
Supplementary table 4. Suggestive risk loci of metabolic subtypes from the EWAS analysis	1	63029433	A	G	0.669068	0.0983836	4.41306e-05	IV
Supplementary table 4. Suggestive risk loci of metabolic subtypes from the EWAS analysis	1	63031616	A	C	0.669068	0.0983836	4.41306e-05	IV
Supplementary table 4. Suggestive risk loci of metabolic subtypes from the EWAS analysis	1	63033941	T	C	0.667743	0.0984442	4.08987e-05	IV
Supplementary table 4. Suggestive risk loci of metabolic subtypes from the EWAS analysis	1	63034363	A	C	0.666551	0.0990839	4.24197e-05	IV
Supplementary table 4. Suggestive risk loci of metabolic subtypes from the EWAS analysis	1	63036807	G	A	0.668046	0.0984528	4.17851e-05	IV
Supplementary table 4. Suggestive risk loci of metabolic subtypes from the EWAS analysis	1	63039533	C	T	0.669691	0.0983751	4.58943e-05	IV
Supplementary table 4. Suggestive risk loci of metabolic subtypes from the EWAS analysis	1	63041086	T	C	0.669068	0.0983836	4.41306e-05	IV
Supplementary table 4. Suggestive risk loci of metabolic subtypes from the EWAS analysis	1	63042126	A	G	0.669068	0.0983836	4.41306e-05	IV
Supplementary table 4. Suggestive risk loci of metabolic subtypes from the EWAS analysis	1	63045506	A	C	0.669068	0.0983836	4.41306e-05	IV
Supplementary table 4. Suggestive risk loci of metabolic subtypes from the EWAS analysis	1	63046039	T	C	0.668182	0.0984204	4.19163e-05	IV
Supplementary table 4. Suggestive risk loci of metabolic subtypes from the EWAS analysis	1	63046578	C	A	0.669068	0.0983836	4.41306e-05	IV
Supplementary table 4. Suggestive risk loci of metabolic subtypes from the EWAS analysis	1	63048045	C	A	0.669068	0.0983836	4.41306e-05	IV
Supplementary table 4. Suggestive risk loci of metabolic subtypes from the EWAS analysis	1	63049593	G	C	0.669068	0.0983836	4.41306e-05	IV
Supplementary table 4. Suggestive risk loci of metabolic subtypes from the EWAS analysis	1	63060037	TAAGAA	T	0.669068	0.0983836	4.41306e-05	IV
Supplementary table 4. Suggestive risk loci of metabolic subtypes from the EWAS analysis	1	63060311	C	A	0.669068	0.0983836	4.41306e-05	IV
Supplementary table 4. Suggestive risk loci of metabolic subtypes from the EWAS analysis	1	63081919	G	A	0.665018	0.0993193	4.00187e-05	IV
Supplementary table 4. Suggestive risk loci of metabolic subtypes from the EWAS analysis	1	63084030	A	G	0.666136	0.099491	4.43801e-05	IV
Supplementary table 4. Suggestive risk loci of metabolic subtypes from the EWAS analysis	1	63085266	T	C	0.666136	0.099491	4.43801e-05	IV
Supplementary table 4. Suggestive risk loci of metabolic subtypes from the EWAS analysis	1	63093617	T	C	0.664729	0.0999221	4.37101e-05	IV
Supplementary table 4. Suggestive risk loci of metabolic subtypes from the EWAS analysis	1	63095711	T	C	0.660607	0.100116	3.45561e-05	IV
Supplementary table 4. Suggestive risk loci of metabolic subtypes from the EWAS analysis	1	63096781	G	C	0.666237	0.0999213	4.81784e-05	IV
Supplementary table 4. Suggestive risk loci of metabolic subtypes from the EWAS analysis	1	63097424	AG	A	0.666237	0.0999213	4.81784e-05	IV
Supplementary table 4. Suggestive risk loci of metabolic subtypes from the EWAS analysis	1	63098641	C	A	0.666237	0.0999213	4.81784e-05	IV
Supplementary table 4. Suggestive risk loci of metabolic subtypes from the EWAS analysis	1	63099577	A	G	0.666237	0.0999213	4.81784e-05	IV
Supplementary table 4. Suggestive risk loci of metabolic subtypes from the EWAS analysis	1	63108374	G	A	0.666125	0.100079	4.91668e-05	IV
Supplementary table 4. Suggestive risk loci of metabolic subtypes from the EWAS analysis	6	153200869	G	A	0.700587	0.0851282	2.91496e-05	IV
Supplementary table 4. Suggestive risk loci of metabolic subtypes from the EWAS analysis	6	153201532	A	G	0.704253	0.0851908	3.86053e-05	IV
Supplementary table 4. Suggestive risk loci of metabolic subtypes from the EWAS analysis	11	116563992	C	G	0.662622	0.0955373	1.64931e-05	IV
Supplementary table 4. Suggestive risk loci of metabolic subtypes from the EWAS analysis	11	116576415	A	G	0.649179	0.0932818	3.62799e-06	IV
Supplementary table 4. Suggestive risk loci of metabolic subtypes from the EWAS analysis	11	116580815	G	C	1.51065	0.0889227	3.49558e-06	IV
Supplementary table 4. Suggestive risk loci of metabolic subtypes from the EWAS analysis	11	116581641	A	G	1.50535	0.088922	4.22863e-06	IV
Supplementary table 4. Suggestive risk loci of metabolic subtypes from the EWAS analysis	11	116583439	A	G	1.51084	0.0890422	3.57803e-06	IV
Supplementary table 4. Suggestive risk loci of metabolic subtypes from the EWAS analysis	11	116585533	A	G	1.50818	0.089119	4.01215e-06	IV
Supplementary table 4. Suggestive risk loci of metabolic subtypes from the EWAS analysis	11	116586283	T	C	1.80552	0.0968658	1.06273e-09	IV
Supplementary table 4. Suggestive risk loci of metabolic subtypes from the EWAS analysis	11	116586423	C	T	1.51922	0.0884917	2.29177e-06	IV
Supplementary table 4. Suggestive risk loci of metabolic subtypes from the EWAS analysis	11	116588375	ATT	A	1.56023	0.0898185	7.32396e-07	IV
Supplementary table 4. Suggestive risk loci of metabolic subtypes from the EWAS analysis	11	116588629	T	C	1.51374	0.0889772	3.17081e-06	IV
Supplementary table 4. Suggestive risk loci of metabolic subtypes from the EWAS analysis	11	116588909	A	G	1.48806	0.0885427	7.15474e-06	IV
Supplementary table 4. Suggestive risk loci of metabolic subtypes from the EWAS analysis	11	116589117	TA	T	1.55263	0.088683	7.0161e-07	IV
Supplementary table 4. Suggestive risk loci of metabolic subtypes from the EWAS analysis	11	116589127	T	C	1.51837	0.0882239	2.20312e-06	IV
Supplementary table 4. Suggestive risk loci of metabolic subtypes from the EWAS analysis	11	116589652	G	C	1.55436	0.0886929	6.59377e-07	IV
Supplementary table 4. Suggestive risk loci of metabolic subtypes from the EWAS analysis	11	116592203	A	G	0.679601	0.0882234	1.19728e-05	IV
Supplementary table 4. Suggestive risk loci of metabolic subtypes from the EWAS analysis	11	116596174	T	C	0.662416	0.0963821	1.92675e-05	IV
Supplementary table 4. Suggestive risk loci of metabolic subtypes from the EWAS analysis	11	116598248	T	C	1.55977	0.0883127	4.81141e-07	IV
Supplementary table 4. Suggestive risk loci of metabolic subtypes from the EWAS analysis	11	116601945	A	G	1.57776	0.0886878	2.72298e-07	IV
Supplementary table 4. Suggestive risk loci of metabolic subtypes from the EWAS analysis	11	116603134	C	G	1.56599	0.0883749	3.87185e-07	IV
Supplementary table 4. Suggestive risk loci of metabolic subtypes from the EWAS analysis	11	116606766	G	A	1.60813	0.100702	2.38622e-06	IV
Supplementary table 4. Suggestive risk loci of metabolic subtypes from the EWAS analysis	11	116607368	A	C	1.60813	0.100702	2.38622e-06	IV
Supplementary table 4. Suggestive risk loci of metabolic subtypes from the EWAS analysis	11	116607437	C	T	1.60813	0.100702	2.38622e-06	IV
Supplementary table 4. Suggestive risk loci of metabolic subtypes from the EWAS analysis	11	116610048	T	C	0.659983	0.0975959	2.06467e-05	IV
Supplementary table 4. Suggestive risk loci of metabolic subtypes from the EWAS analysis	11	116610294	C	T	0.688624	0.0915039	4.56235e-05	IV
Supplementary table 4. Suggestive risk loci of metabolic subtypes from the EWAS analysis	11	116611733	C	G	1.60935	0.100172	2.03274e-06	IV
Supplementary table 4. Suggestive risk loci of metabolic subtypes from the EWAS analysis	11	116611827	A	T	1.56742	0.0990684	5.71745e-06	IV
Supplementary table 4. Suggestive risk loci of metabolic subtypes from the EWAS analysis	11	116612659	C	A	0.651742	0.0982851	1.32606e-05	IV
Supplementary table 4. Suggestive risk loci of metabolic subtypes from the EWAS analysis	11	116622299	A	G	2.59739	0.196831	1.23849e-06	IV
Supplementary table 4. Suggestive risk loci of metabolic subtypes from the EWAS analysis	11	116623213	TA	T	1.63034	0.0889908	3.96041e-08	IV
Supplementary table 4. Suggestive risk loci of metabolic subtypes from the EWAS analysis	11	116623659	C	T	1.6052	0.0888931	1.0164e-07	IV
Supplementary table 4. Suggestive risk loci of metabolic subtypes from the EWAS analysis	11	116624703	G	T	1.57684	0.0992472	4.45908e-06	IV
Supplementary table 4. Suggestive risk loci of metabolic subtypes from the EWAS analysis	11	116624727	C	G	1.62963	0.100619	1.21339e-06	IV
Supplementary table 4. Suggestive risk loci of metabolic subtypes from the EWAS analysis	11	116631391	C	T	0.65054	0.0982797	1.21548e-05	IV
Supplementary table 4. Suggestive risk loci of metabolic subtypes from the EWAS analysis	11	116631707	T	C	1.61619	0.100583	1.81604e-06	IV
Supplementary table 4. Suggestive risk loci of metabolic subtypes from the EWAS analysis	11	116639104	A	G	1.60745	0.100702	2.43593e-06	IV
Supplementary table 4. Suggestive risk loci of metabolic subtypes from the EWAS analysis	11	116640237	A	G	1.61182	0.10072	2.14231e-06	IV
Supplementary table 4. Suggestive risk loci of metabolic subtypes from the EWAS analysis	11	116647607	C	T	1.59629	0.0997465	2.74941e-06	IV
Supplementary table 4. Suggestive risk loci of metabolic subtypes from the EWAS analysis	11	116648917	G	C	1.60001	0.0995459	2.34055e-06	IV
Supplementary table 4. Suggestive risk loci of metabolic subtypes from the EWAS analysis	11	116649806	A	G	2.79761	0.181337	1.40132e-08	IV
Supplementary table 4. Suggestive risk loci of metabolic subtypes from the EWAS analysis	11	116650638	T	C	2.79761	0.181441	1.42815e-08	IV
Supplementary table 4. Suggestive risk loci of metabolic subtypes from the EWAS analysis	11	116651115	C	T	1.44186	0.0855011	1.86999e-05	IV
Supplementary table 4. Suggestive risk loci of metabolic subtypes from the EWAS analysis	11	116652423	G	A	1.59956	0.0997388	2.48196e-06	IV
Supplementary table 4. Suggestive risk loci of metabolic subtypes from the EWAS analysis	11	116652491	A	G	1.59956	0.0997388	2.48196e-06	IV
Supplementary table 4. Suggestive risk loci of metabolic subtypes from the EWAS analysis	11	116653296	C	T	1.60299	0.0983655	1.60978e-06	IV
Supplementary table 4. Suggestive risk loci of metabolic subtypes from the EWAS analysis	11	116654435	T	C	0.640945	0.0990777	7.13808e-06	IV
Supplementary table 4. Suggestive risk loci of metabolic subtypes from the EWAS analysis	11	116656788	C	A	1.61098	0.0997324	1.74252e-06	IV
Supplementary table 4. Suggestive risk loci of metabolic subtypes from the EWAS analysis	11	116657667	T	C	2.82618	0.182552	1.26205e-08	IV
Supplementary table 4. Suggestive risk loci of metabolic subtypes from the EWAS analysis	11	116660686	G	A	1.63652	0.0998525	8.09745e-07	IV
Supplementary table 4. Suggestive risk loci of metabolic subtypes from the EWAS analysis	11	116661392	A	C	2.7167	0.179214	2.45179e-08	IV
Supplementary table 4. Suggestive risk loci of metabolic subtypes from the EWAS analysis	11	116661826	T	C	1.64333	0.100219	7.18252e-07	IV
Supplementary table 4. Suggestive risk loci of metabolic subtypes from the EWAS analysis	11	116662579	C	T	2.01981	0.0945693	1.05568e-13	IV
Supplementary table 4. Suggestive risk loci of metabolic subtypes from the EWAS analysis	11	116663707	G	A	2.02842	0.0946152	7.71533e-14	IV
Supplementary table 4. Suggestive risk loci of metabolic subtypes from the EWAS analysis	11	116664776	A	T	0.633174	0.103146	9.39211e-06	IV
Supplementary table 4. Suggestive risk loci of metabolic subtypes from the EWAS analysis	11	116776826	T	A	0.62318	0.116342	4.80487e-05	IV
Supplementary table 4. Suggestive risk loci of metabolic subtypes from the EWAS analysis	11	116792961	G	A	0.616198	0.116577	3.27624e-05	IV
Supplementary table 4. Suggestive risk loci of metabolic subtypes from the EWAS analysis	11	116797684	C	T	0.617219	0.116863	3.64313e-05	IV
Supplementary table 4. Suggestive risk loci of metabolic subtypes from the EWAS analysis	11	116813979	C	A	0.620923	0.116366	4.21683e-05	IV
Supplementary table 4. Suggestive risk loci of metabolic subtypes from the EWAS analysis	11	116816216	C	G	0.620923	0.116366	4.21683e-05	IV
Supplementary table 4. Suggestive risk loci of metabolic subtypes from the EWAS analysis	11	116817655	C	A	0.620923	0.116366	4.21683e-05	IV
Supplementary table 4. Suggestive risk loci of metabolic subtypes from the EWAS analysis	11	116818343	G	A	0.620923	0.116366	4.21683e-05	IV
Supplementary table 4. Suggestive risk loci of metabolic subtypes from the EWAS analysis	11	116820088	C	T	0.620923	0.116366	4.21683e-05	IV
Supplementary table 4. Suggestive risk loci of metabolic subtypes from the EWAS analysis	11	116822528	T	C	0.623427	0.116386	4.90809e-05	IV
Supplementary table 4. Suggestive risk loci of metabolic subtypes from the EWAS analysis	11	116879224	T	C	0.621318	0.116712	4.54871e-05	IV
Supplementary table 4. Suggestive risk loci of metabolic subtypes from the EWAS analysis	11	116880456	C	T	0.621318	0.116712	4.54871e-05	IV
Supplementary table 4. Suggestive risk loci of metabolic subtypes from the EWAS analysis	11	116940449	C	T	0.610658	0.116884	2.446e-05	IV

## Sheet: Stable5
Supplementary table S5. Gene Ontology pathway analysis for metabolic subtypes
Subtype	Category	Pathway Term	NGENES	P
I	Cellular Component	myosin complex	54	1.1522e-05
I	Biological Process	dna strand elongation involved in dna replication	8	1.2093e-05
I	Biological Process	regulation of ion transport	433	1.381e-05
I	Biological Process	myelin maintenance	7	1.5467e-05
I	Biological Process	regulation of ion transmembrane transport	298	2.2488e-05
I	Biological Process	regulation of transmembrane transport	351	5.6902e-05
I	Cellular Component	actin cytoskeleton	343	5.8694e-05
I	Biological Process	negative regulation of reactive oxygen species metabolic process	16	0.00013183
I	Biological Process	maintenance of protein location in mitochondrion	5	0.00020535
I	Molecular Function	lipopolysaccharide binding	21	0.00021756
II	Biological Process	chaperone mediated autophagy	12	1.6807e-08
II	Molecular Function	y form dna binding	4	1.0773e-06
II	Biological Process	regulation of chaperone mediated autophagy	6	1.1456e-06
II	Biological Process	g quadruplex dna unwinding	5	1.272e-06
II	Cellular Component	dynactin complex	3	1.928e-06
II	Molecular Function	single stranded dna binding	69	4.3039e-06
II	Biological Process	response to hydroxyurea	3	6.387e-06
II	Molecular Function	protein containing complex binding	747	6.4057e-06
II	Biological Process	regulation of mitotic recombination	5	6.4475e-06
II	Molecular Function	g quadruplex dna binding	8	7.2514e-06
III	Biological Process	negative regulation of jun kinase activity	7	1.0679e-06
III	Biological Process	positive regulation of peptidyl serine phosphorylation	63	2.2579e-05
III	Biological Process	mitochondrial rna modification	9	4.8975e-05
III	Biological Process	trna threonylcarbamoyladenosine metabolic process	11	5.8596e-05
III	Biological Process	mitochondrial trna processing	10	7.8495e-05
III	Biological Process	negative regulation of cytoskeleton organization	94	0.00010467
III	Cellular Component	endoplasmic reticulum subcompartment	15	0.00013955
III	Cellular Component	endoplasmic reticulum tubular network	14	0.00014824
III	Biological Process	box c d snornp assembly	6	0.00025123
III	Biological Process	gamma delta t cell differentiation	5	0.0003281
IV	Biological Process	rap protein signal transduction	7	2.4607e-06
IV	Biological Process	positive regulation of protein export from nucleus	14	1.2454e-05
IV	Cellular Component	contractile fiber	157	2.0159e-05
IV	Biological Process	regulation of nucleocytoplasmic transport	78	2.7822e-05
IV	Biological Process	chaperone mediated autophagy	12	3.0259e-05
IV	Biological Process	regulation of protein export from nucleus	28	4.5848e-05
IV	Biological Process	regulation of chaperone mediated autophagy	6	5.7678e-05
IV	Molecular Function	rap guanyl nucleotide exchange factor activity	5	6.4207e-05
IV	Biological Process	regulation of syncytium formation by plasma membrane fusion	18	0.00010314
IV	Cellular Component	ptw pp1 phosphatase complex	5	0.0001193

## Sheet: Stable6
Supplementary table S6. GTEx tissue-specific enrichment analysis for metabolic subtypes
Tissue type	Subtype I	Subtype II	Subtype III	Subtype IV
Adipose Subcutaneous	0.0087833	0.0056526	0.00904	0.0023355
Adipose Visceral Omentum	0.0019113	0.0045701	0.0076568	0.0023007
Adrenal Gland	0.0053699	0.009876	0.0089579	0.0091966
Artery Aorta	0.0075528	0.0074029	0.0046474	0.0014548
Artery Coronary	0.0030755	0.0075197	0.0073491	5.9444e-05
Artery Tibial	0.0034462	0.0043988	0.0029049	7.9017e-05
Bladder	0.0072405	0.0068282	0.0056952	0.0019678
Brain Amygdala	9.2935e-05	0.0018599	0.0050547	0.0054612
Brain Anterior cingulate cortex BA24	6.7763e-05	0.0014246	0.0034693	0.0070408
Brain Caudate basal ganglia	0.0015482	0.0031909	0.0025498	0.0054861
Brain Cerebellar Hemisphere	0.0057587	0.002707	7.9734e-05	0.0072
Brain Cerebellum	0.0056251	0.0019421	5.8385e-05	0.007433
Brain Cortex	0.0011256	0.0010413	0.0022415	0.006092
Brain Frontal Cortex BA9	0.0012312	0.0013918	0.0025697	0.006615
Brain Hippocampus	0.0020295	0.0030423	0.0046883	0.004645
Brain Hypothalamus	0.0015573	0.0016017	0.0070959	0.0039752
Brain Nucleus accumbens basal ganglia	0.0012502	0.0034797	0.0028007	0.007032
Brain Putamen basal ganglia	0.0010519	0.0021213	0.0013117	0.0045741
Brain Spinal cord cervical c-1	0.0039028	0.0069892	0.006287	0.0015522
Brain Substantia nigra	0.0020255	0.0035728	0.0063334	0.0039683
Breast Mammary Tissue	0.0083232	0.0066658	0.0076563	9.5956e-05
Cells Cultured fibroblasts	0.0095696	0.0087405	0.0080208	0.0091154
Cells EBV-transformed lymphocytes	0.0065416	0.0032861	0.0043652	0.0044642
Cervix Ectocervix	0.0062822	0.0082488	0.0082322	0.0059513
Cervix Endocervix	0.0076799	0.0096508	0.0087811	0.0029839
Colon Sigmoid	0.0025093	0.0079726	0.0048885	0.0043892
Colon Transverse	0.0052922	0.0096624	0.0088793	0.0092771
Esophagus Gastroesophageal Junction	0.0030295	0.0038207	0.0010704	0.0014624
Esophagus Mucosa	0.0091192	0.0028456	0.003325	0.0095395
Esophagus Muscularis	0.003076	0.0036195	0.0014695	0.001359
Fallopian Tube	0.0090186	0.0097648	0.0052091	0.0027816
Heart Atrial Appendage	1.4178e-05	1.2738e-05	7.2603e-05	2.4745e-05
Heart Left Ventricle	9.8686e-06	3.256e-06	7.4737e-05	1.9322e-06
Kidney Cortex	0.004627	0.0054473	4.7824e-05	0.0047522
Kidney Medulla	0.0072502	0.0036382	7.7395e-05	0.0053947
Liver	0.0079861	0.0047311	0.0075877	0.0067047
Lung	0.0031167	0.0068756	0.0066464	0.0018214
Minor Salivary Gland	0.0088304	0.0069258	0.0042366	0.0076683
Muscle Skeletal	0.0027164	6.4547e-06	0.0075568	4.7337e-05
Nerve Tibial	0.0078706	0.0084568	0.0089303	0.0023608
Ovary	0.0046652	0.0099875	0.0056107	0.0083957
Pancreas	0.0041019	0.0027885	0.0042311	0.0085868
Pituitary	0.0077631	0.0094643	0.0062633	0.0076271
Prostate	0.0047563	0.0090446	0.0052315	0.0016631
Skin Not Sun Exposed Suprapubic	0.009668	0.0065178	0.0072008	0.0098483
Skin Sun Exposed Lower leg	0.0097294	0.0061882	0.0075542	0.0097368
Small Intestine Terminal Ileum	0.0049809	0.0080054	0.0081612	0.0076378
Spleen	0.007715	0.0047857	0.0071987	0.0023815
Stomach	0.0047269	0.0093756	0.0049095	0.0067924
Testis	0.008492	0.007515	0.0029567	0.0086544
Thyroid	0.0087553	0.0062357	0.0032349	0.0020982
Uterus	0.0027842	0.0069245	0.0052768	0.0030337
Vagina	0.0080686	0.0046971	0.0082256	0.0083902
Whole Blood	0.0039348	0.0025115	0.0098007	0.0016379
