# Supplementary figures and images for: Identification of Novel Metabolic Subtypes Using Multi-Trait Limited Mixed Regression in the Chinese Population
Source: MDPI journal article supplement (doi:10.3390/biomedicines10123093), 2022-12-01

**Supplementary figure S1. Cross-validated likelihood for different number of subtypes (K)**

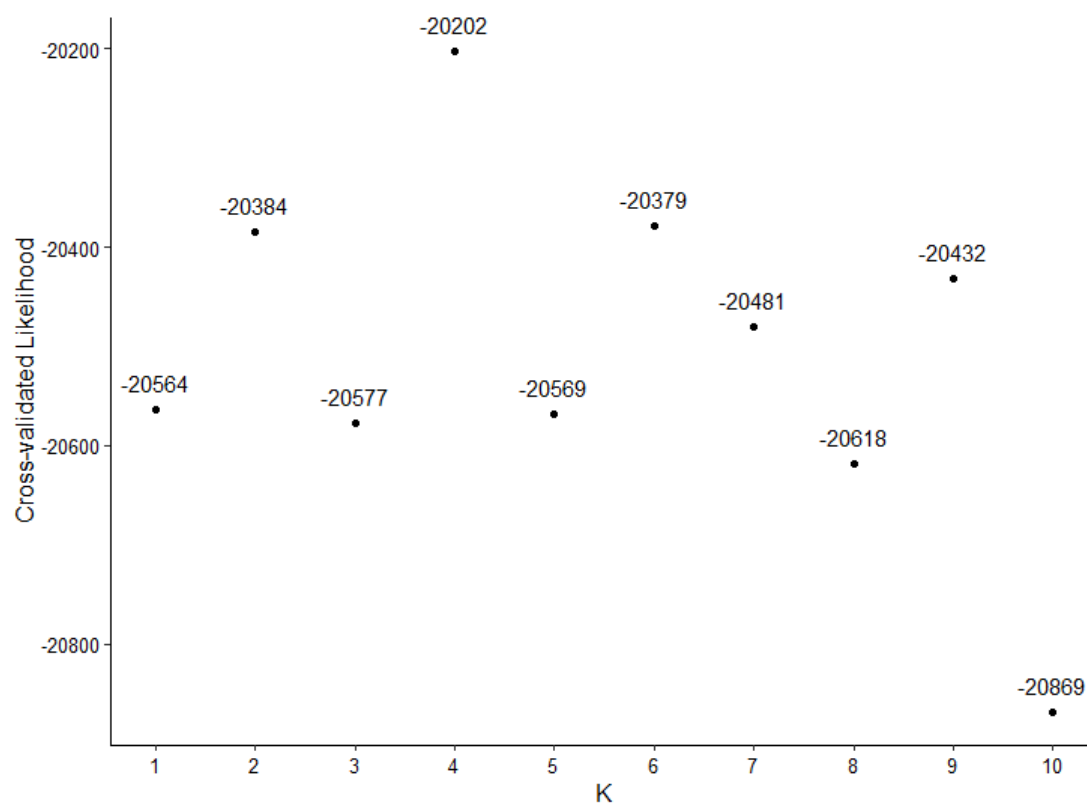

Supplement: s1 [file s1]
